# Supplementary material
Source: MDPI journal article supplement (https://www.mdpi.com/2297-8739/10/9/482)
Supplement: s1 [file s1]

# A Topic Modeling Approach to Discover the Global and Local Subjects in Membrane Distillation Separation Process

Ersin Aytaç<sup>1</sup> and Mohamed Khayet<sup>2,3,\*</sup>

<sup>1</sup> Department of Environmental Engineering, Zonguldak Bülent Ecevit University, 67100 Zonguldak, Türkiye; ersin.aytac@beun.edu.tr

<sup>2</sup> Department of Structure of Matter, Thermal Physics and Electronics, Faculty of Physics, University Complutense of Madrid, Avda. Complutense s/n, 28040 Madrid, Spain; khayetm@fis.ucm.es

<sup>3</sup> Madrid Institute for Advanced Studies of Water (IMDEA Water Institute), Calle Punto Net N° 4, 28805 Alcalá de Henares, Madrid, Spain

\* Correspondence: [khayetm@fis.ucm.es](mailto:khayetm@fis.ucm.es)

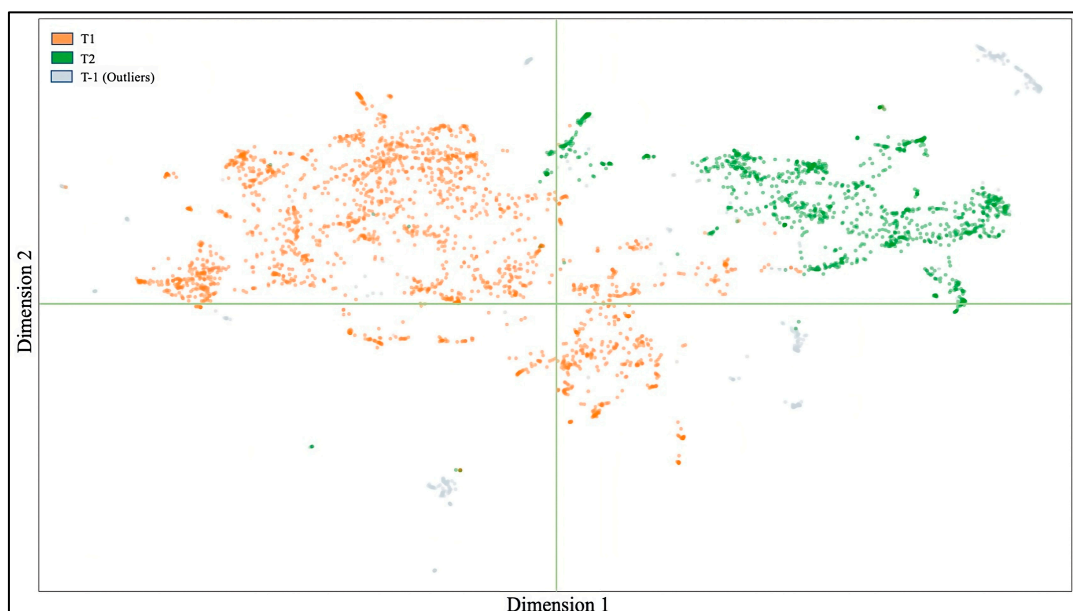

**Figure S1.** Global topics of MD domain ( $min\_cluster\_size = 1000$ ).

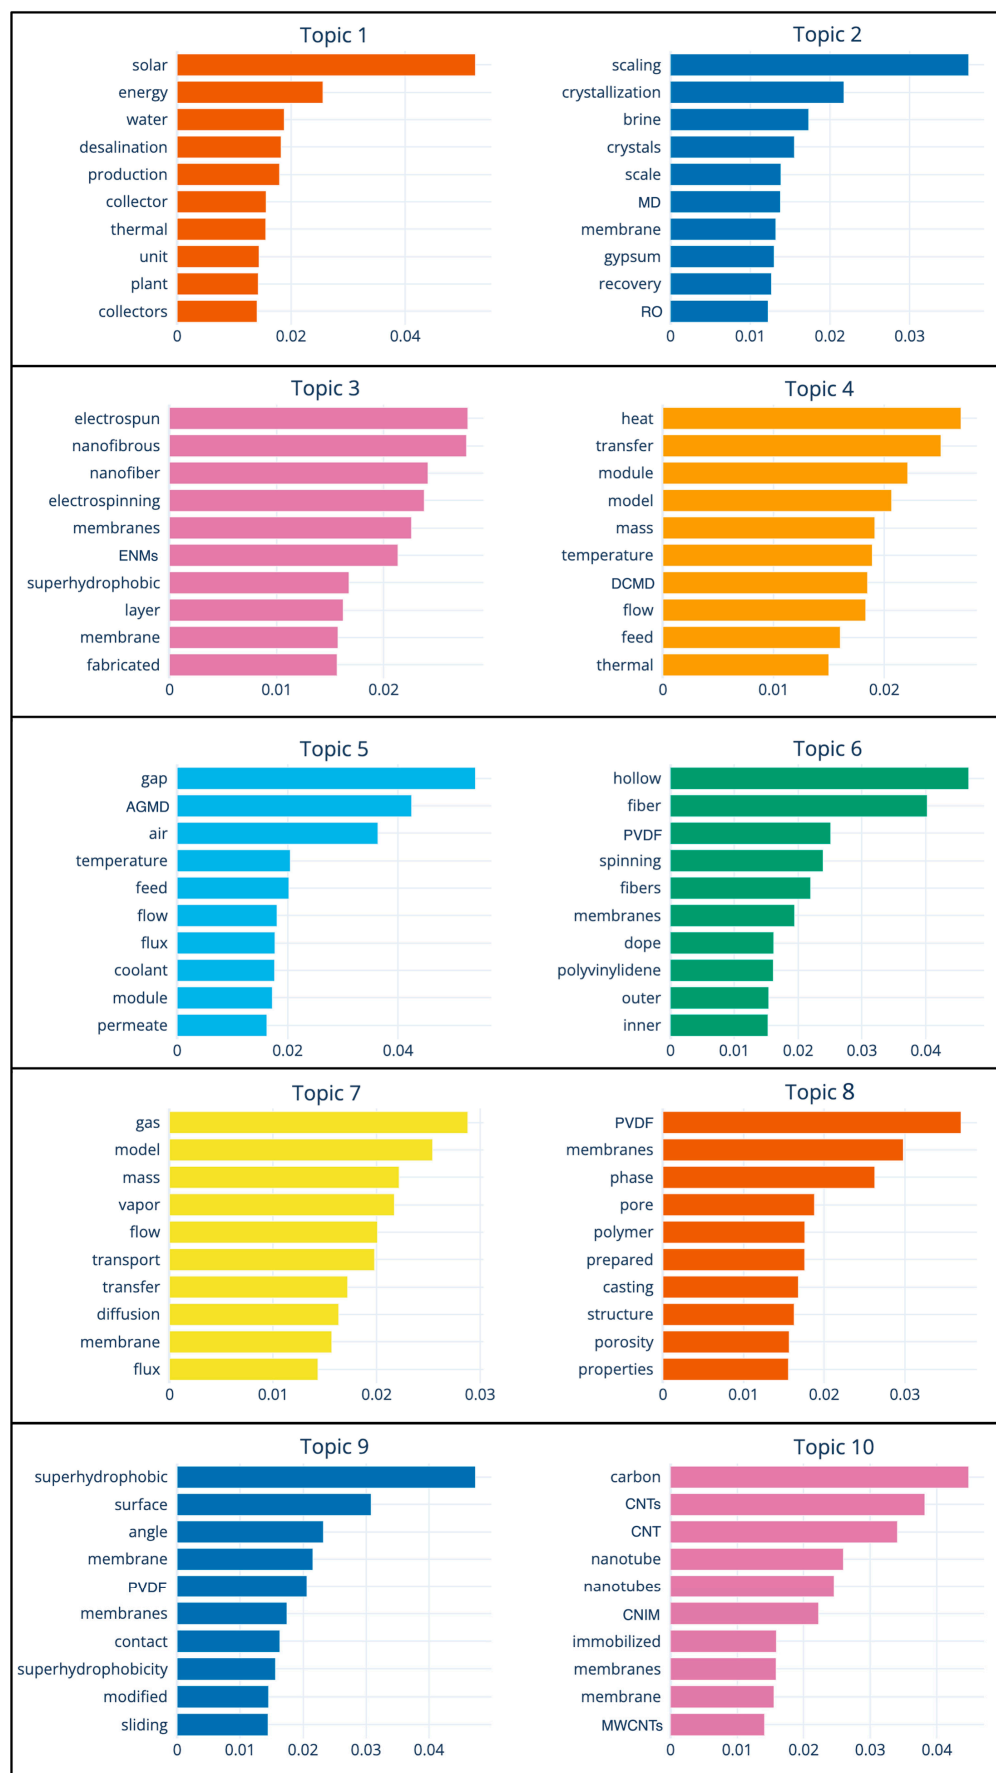

**Figure S2.** Topic term scores.

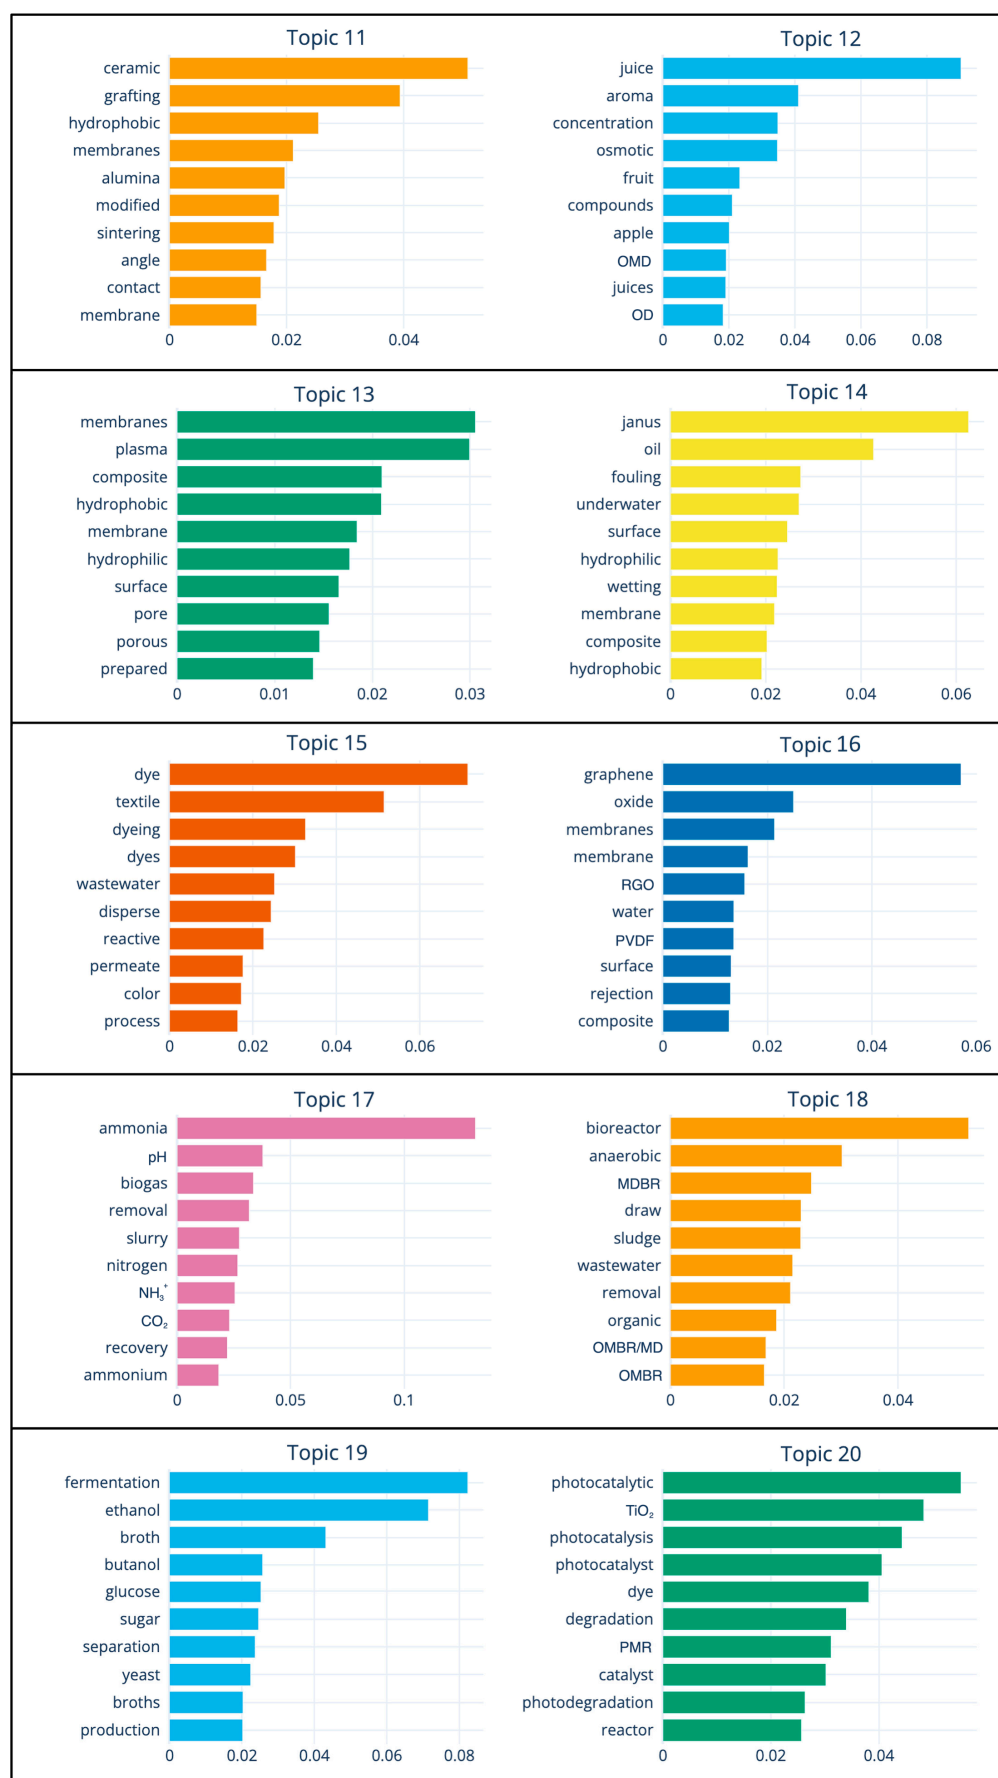

**Figure S2.** Topic term scores (continued).

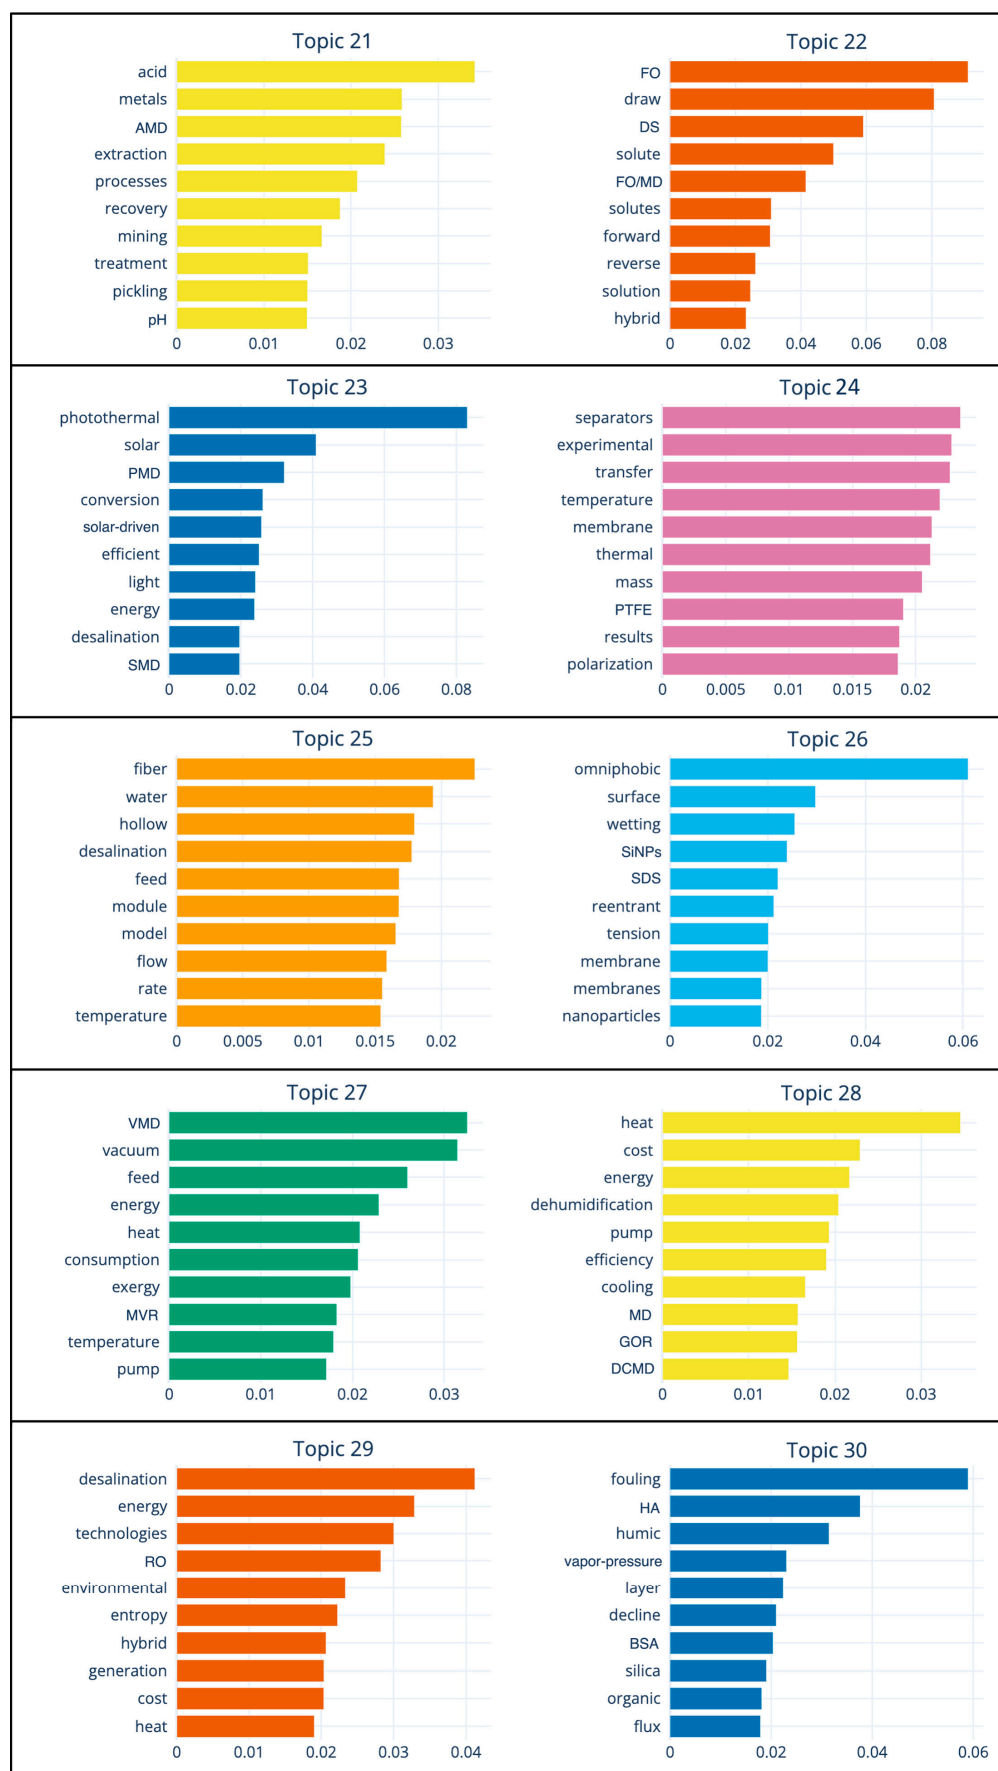

**Figure S2.** Topic term scores (continued).



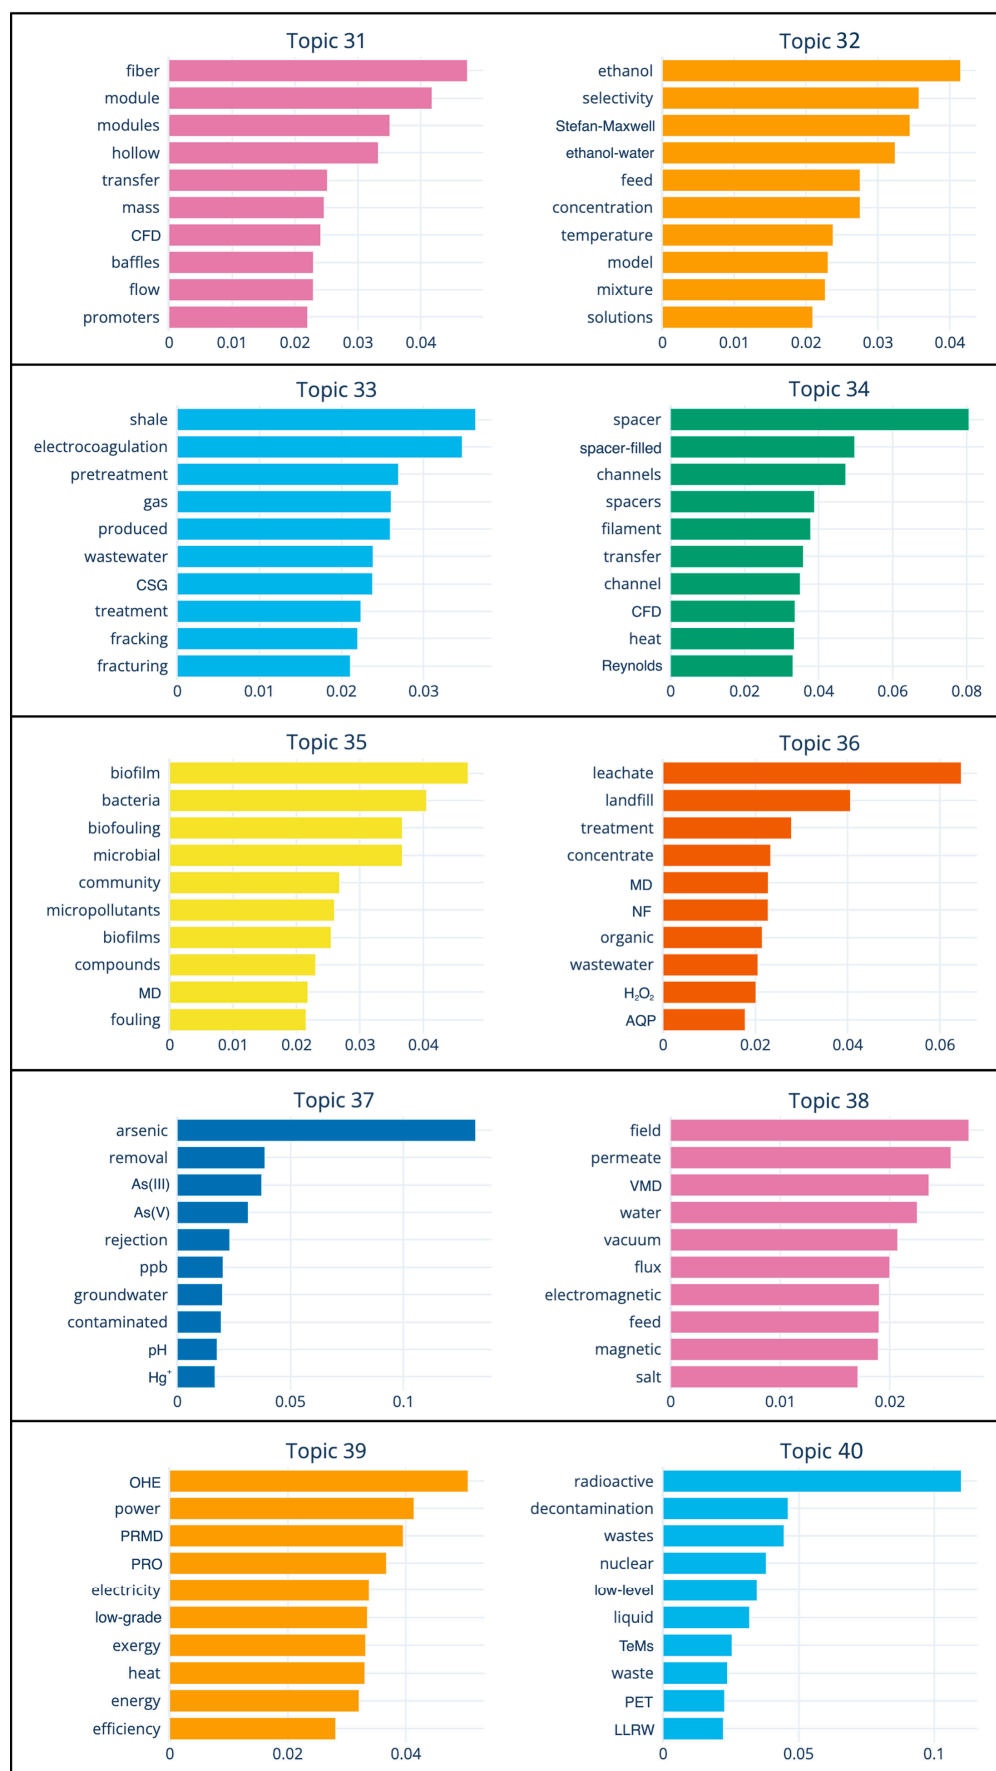

**Figure S2.** Topic term scores (continued).

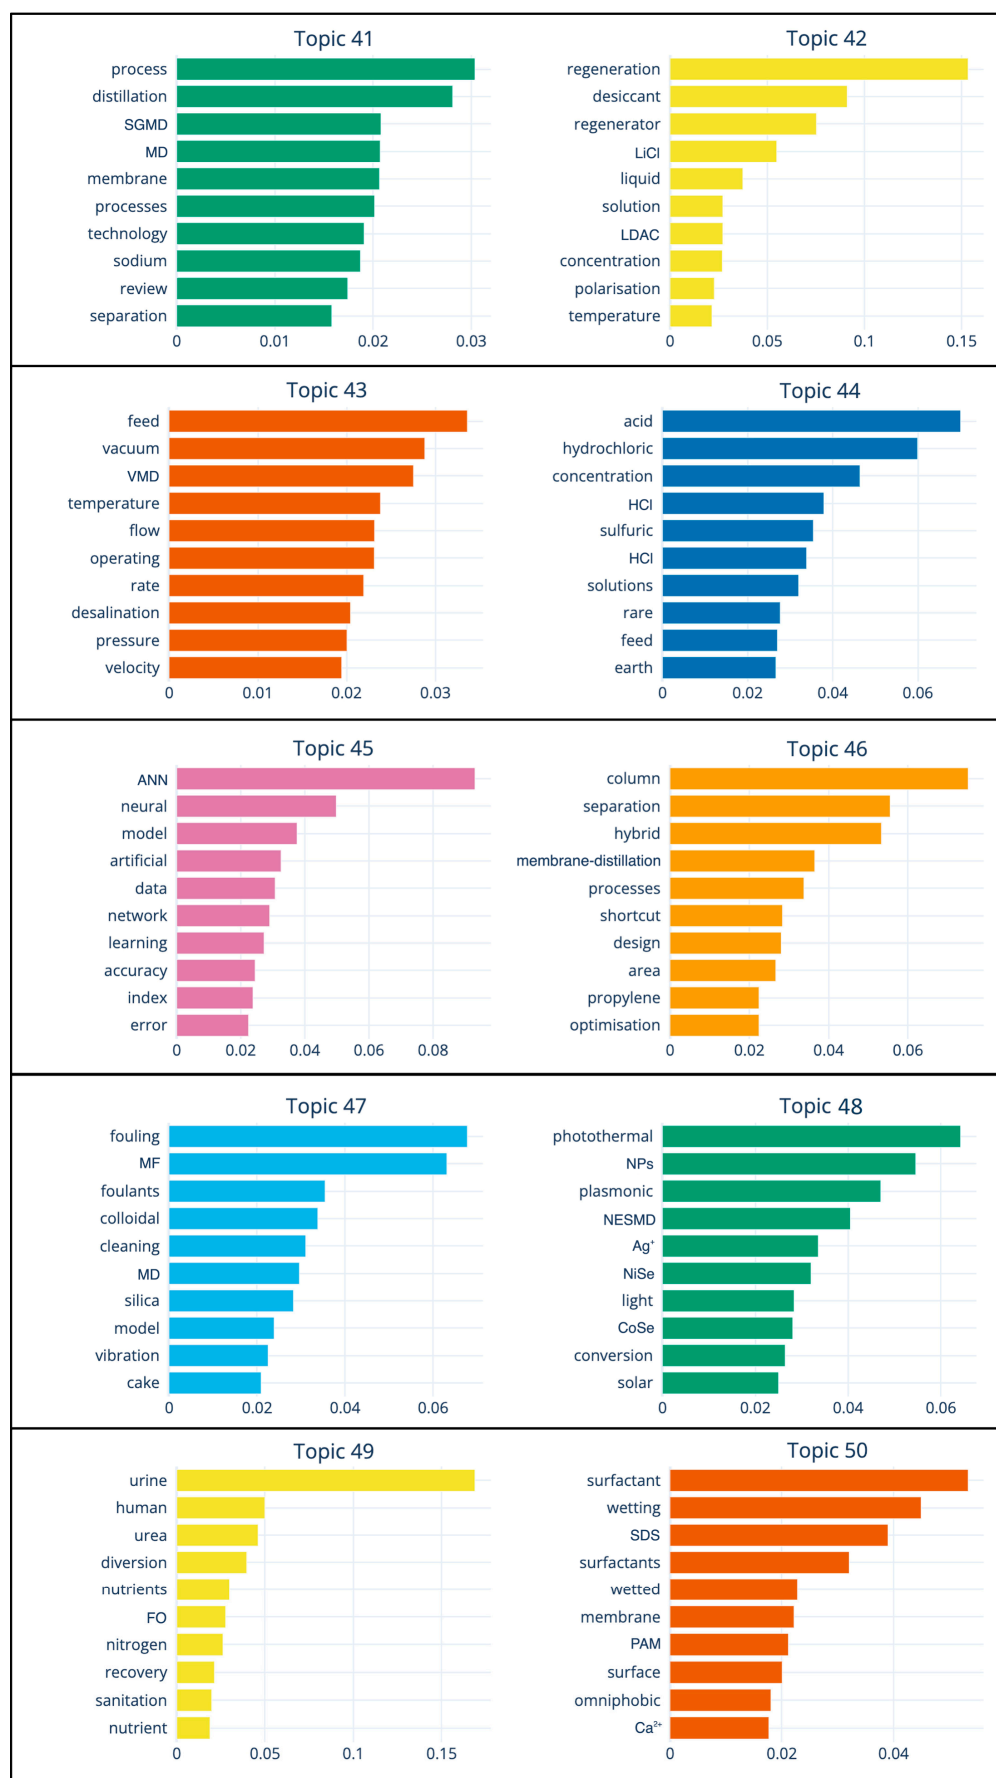

**Figure S2.** Topic term scores (continued).

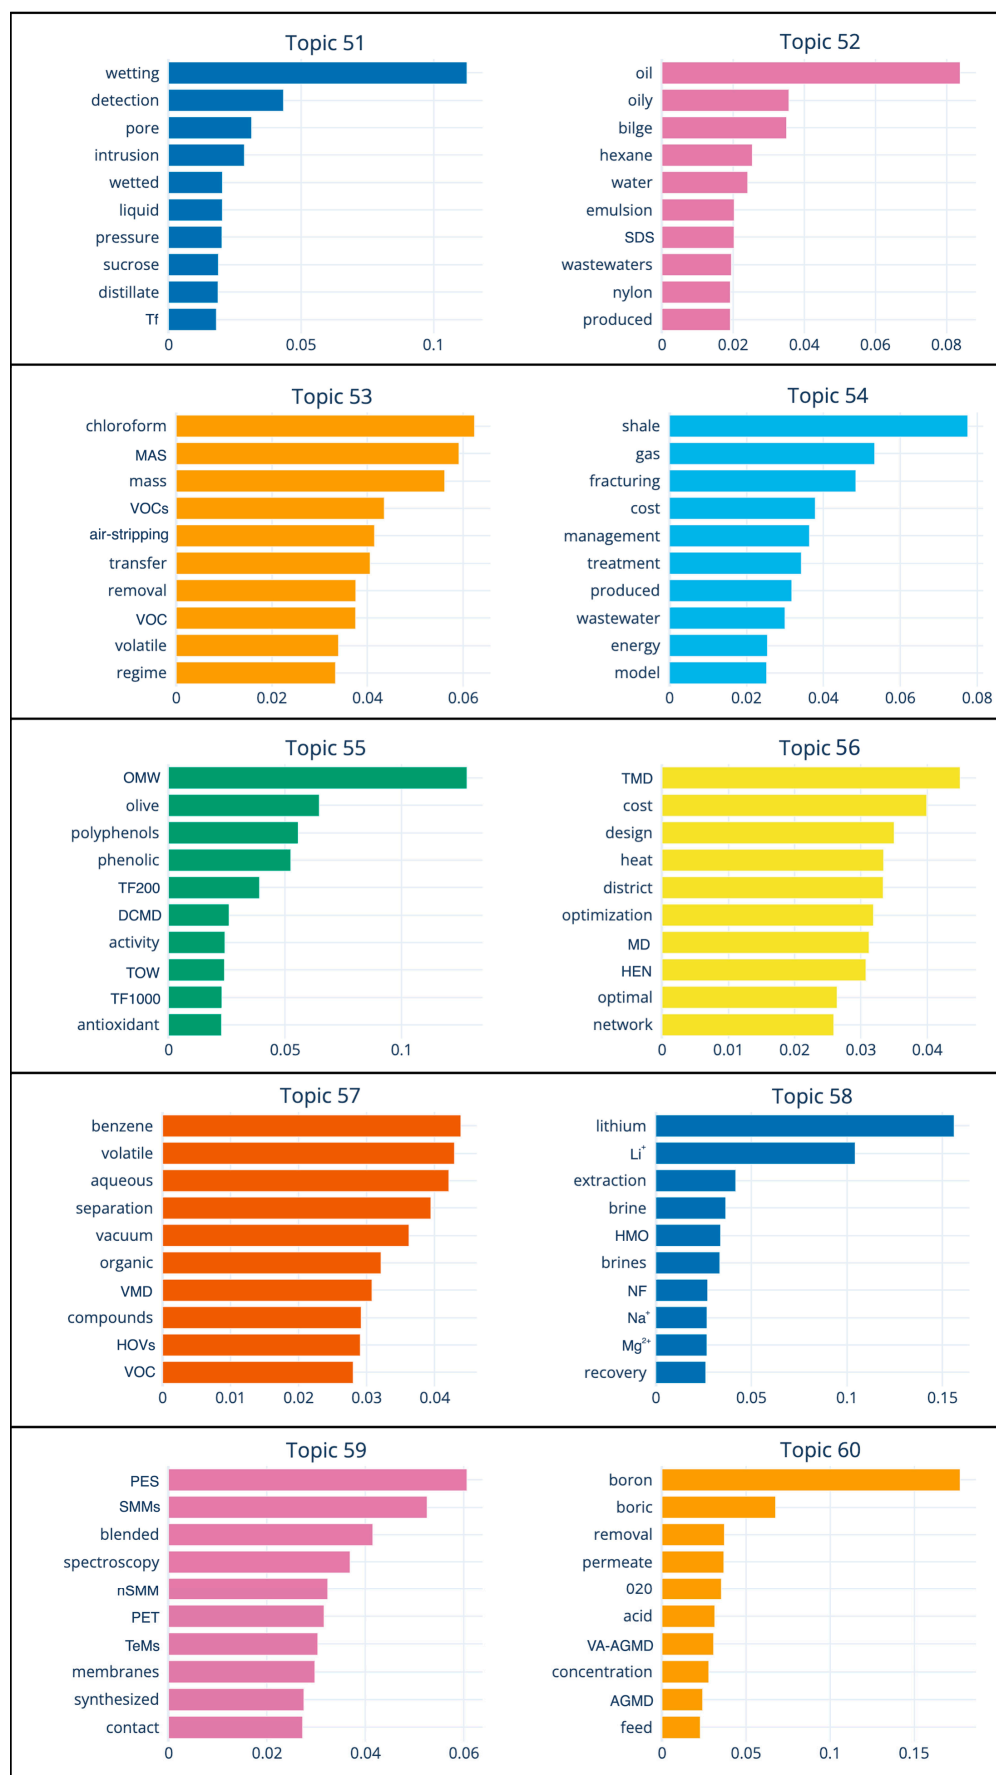

**Figure S2.** Topic term scores (continued).

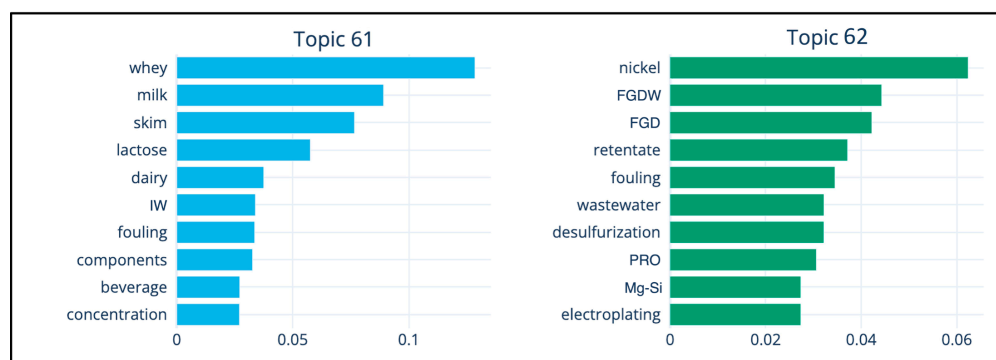

**Figure S2.** Topic term scores (continued).

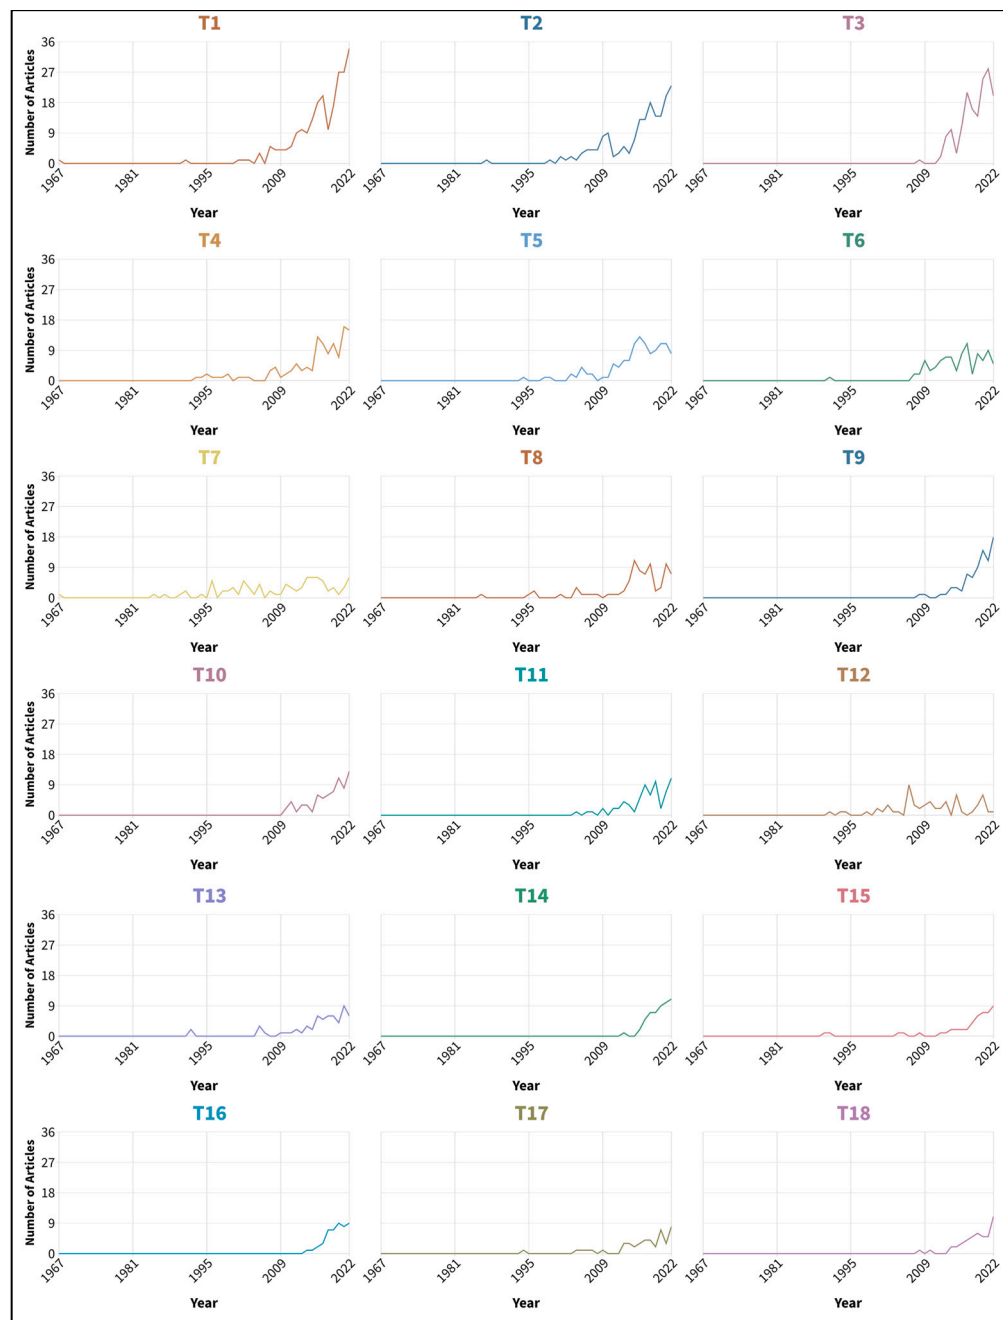

**Figure S3.** Topics over time.

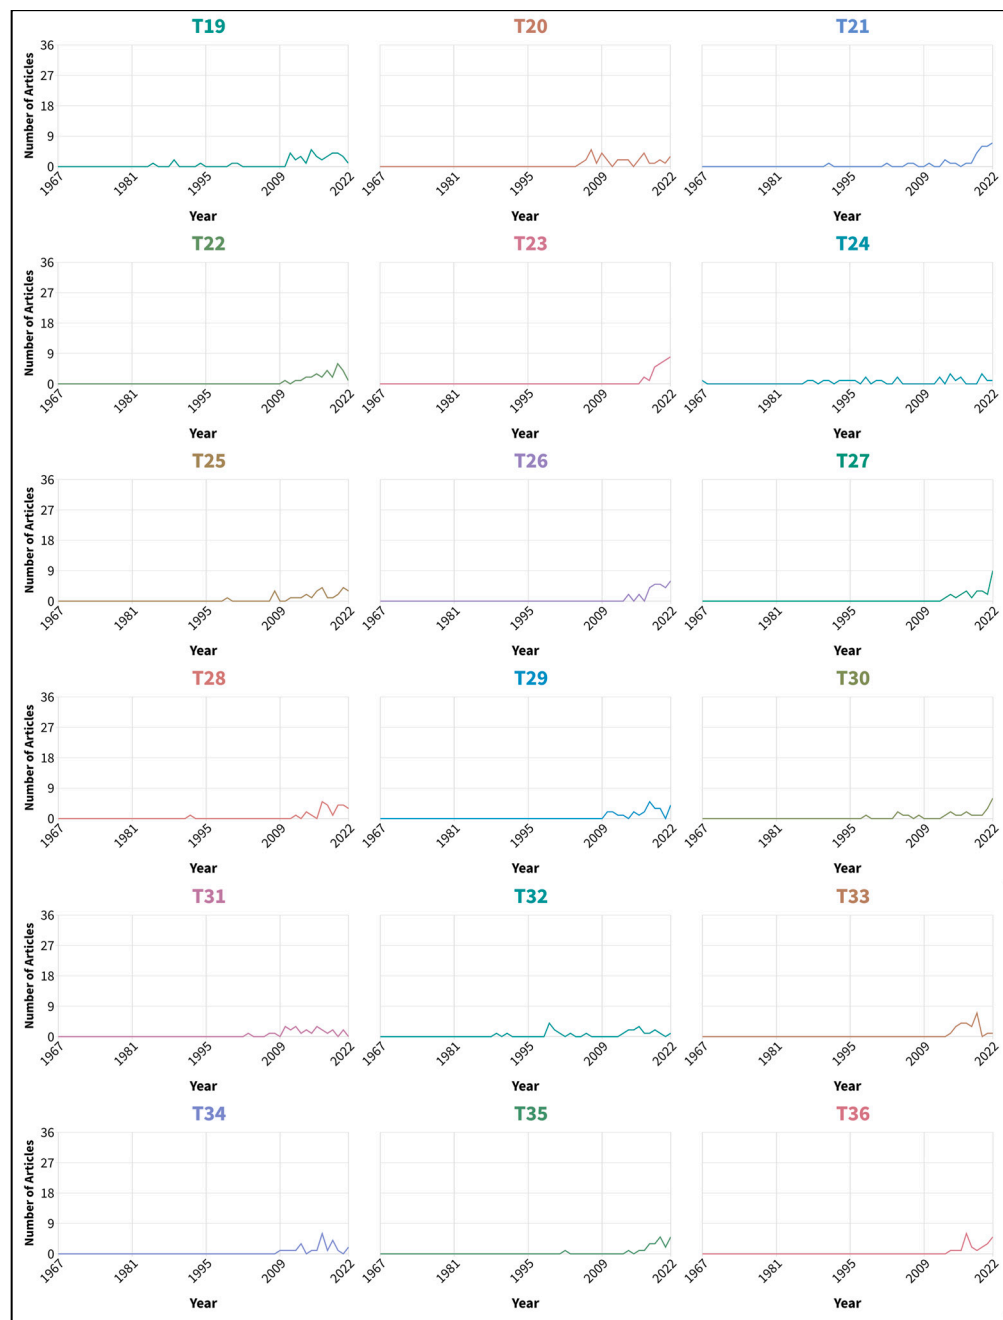

**Figure S3.** Topics over time (continued).

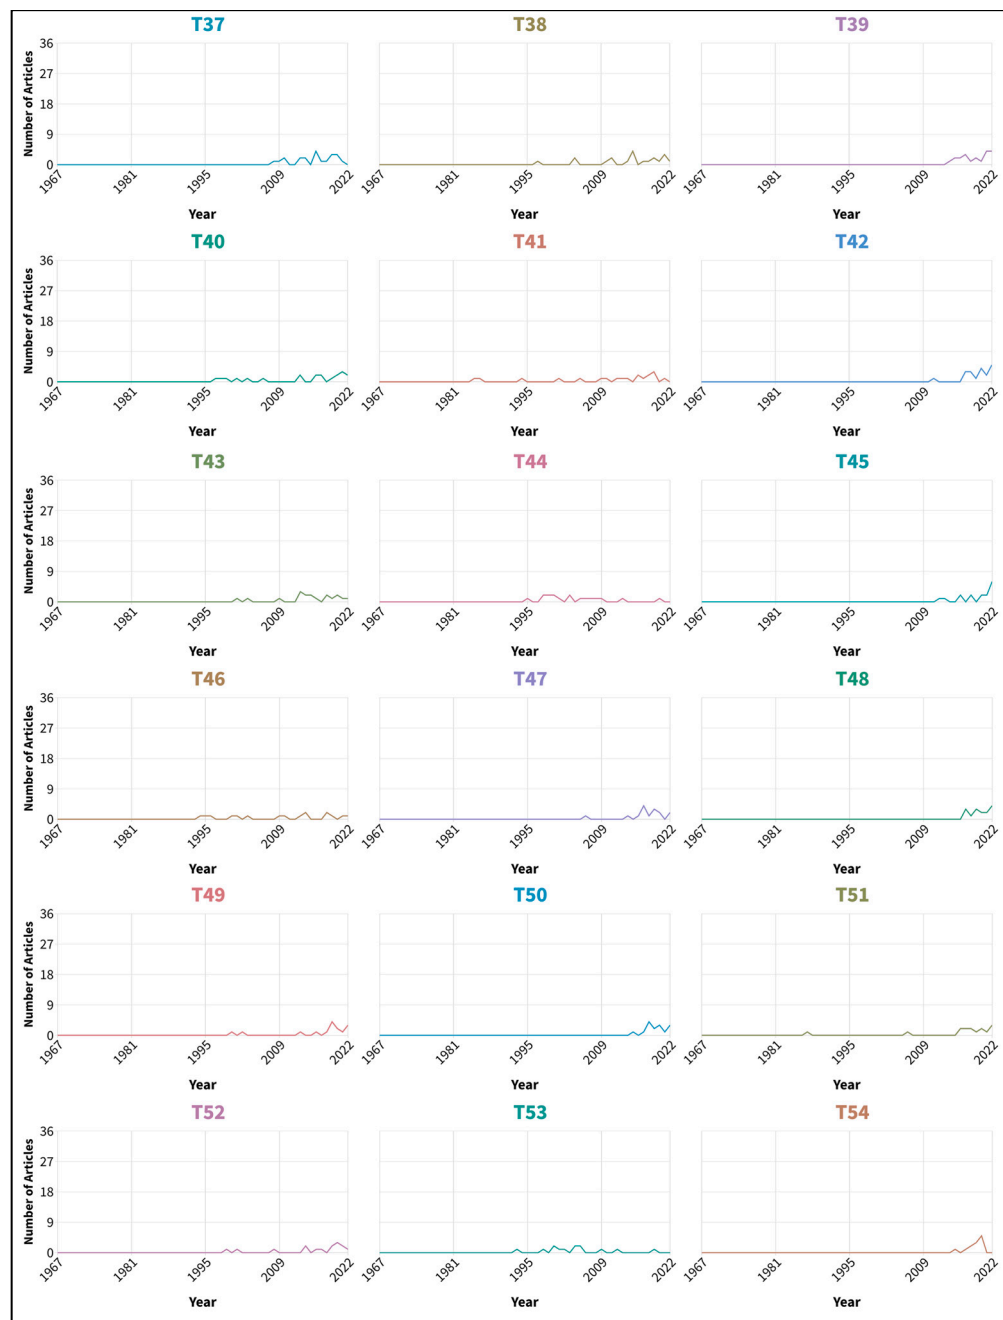

**Figure S3.** Topics over time (continued).

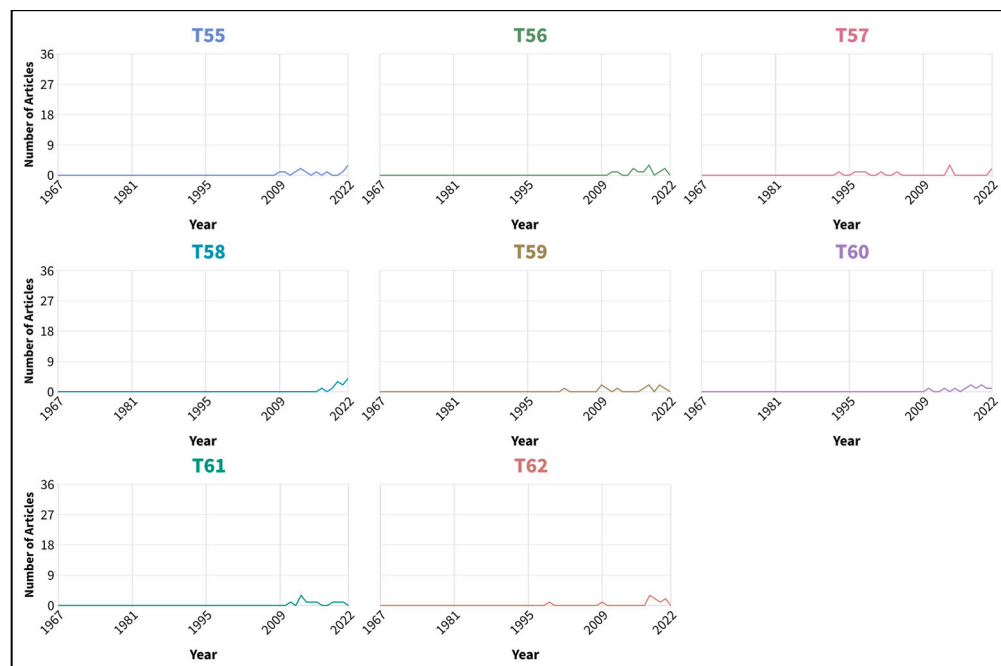

**Figure S3.** Topics over time (continued).
